# Supplementary material for: Human ribosome interactions reframe neomycin toxicity
Source: Research Square preprint supplement (doi:10.21203/rs.3.rs-7177598/v1), 2025-08-18
Supplement: Supplementary file 1 [file 40f8c459b16cf6c92fcedf9c.pdf]

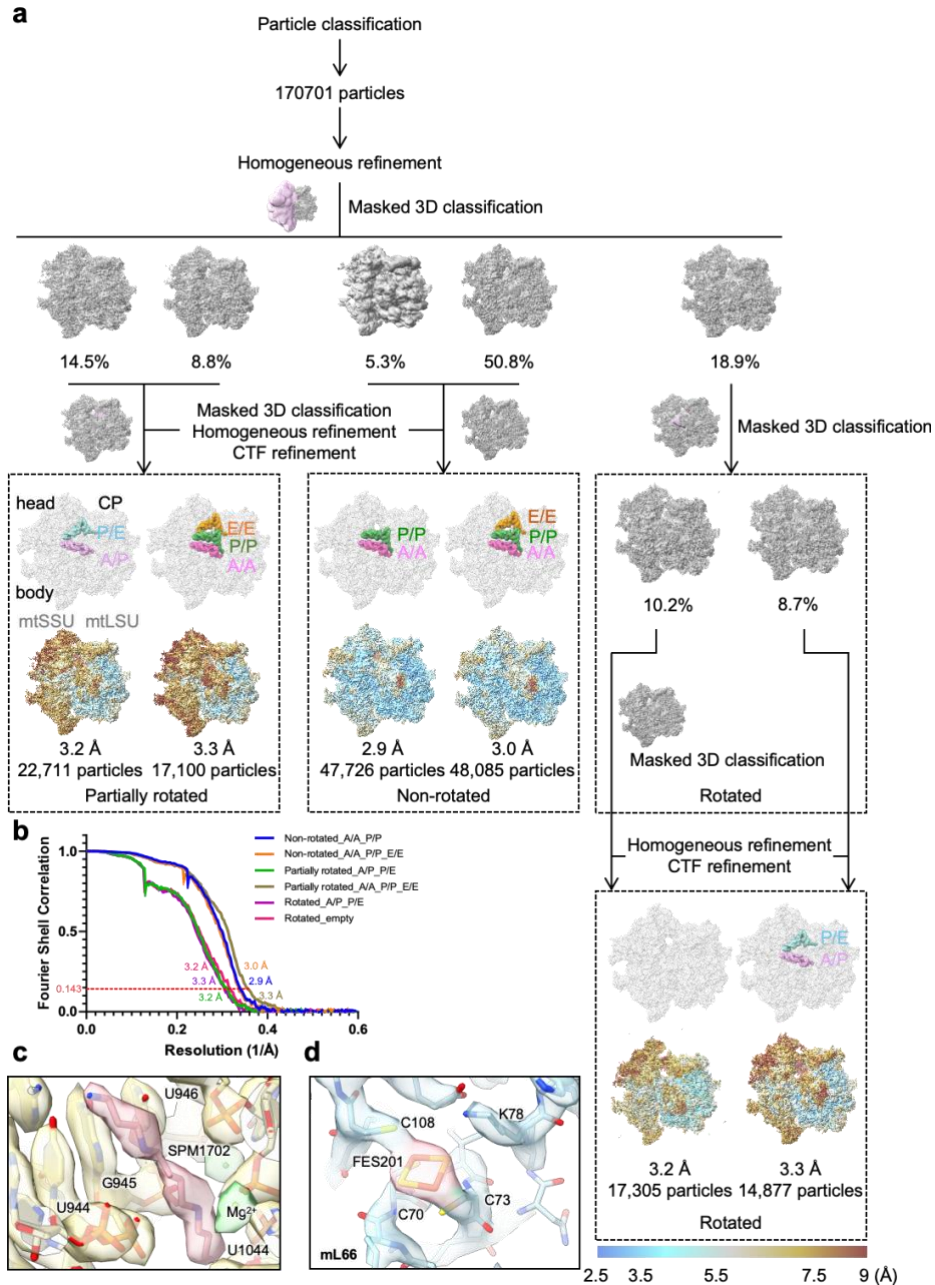

**Supplementary Fig. 1| Cryo-EM data processing of neomycin-treated mitoribosomes.** **a** Cryo-EM data processing workflow of mitoribosomes incubated with 50  $\mu$ M neomycin. Overall structures of mitoribosomes with bound tRNAs and cofactors, along with local resolution estimation results with the resolution scale ( $\text{\AA}$ ) are shown. **b** Fourier shell correlation (FSC) curves for the reported maps, indicating overall resolution at FSC=0.143. **c-d** cryo-EM density for representative cofactors from the same map as Fig. 1 are displayed: SPM1702 (**c**) and FES201 (**d**) bound to the non-rotated mitoribosome with A/A and P/P site tRNA (overall resolution=2.9  $\text{\AA}$ ,  $\sigma$ =0.90).

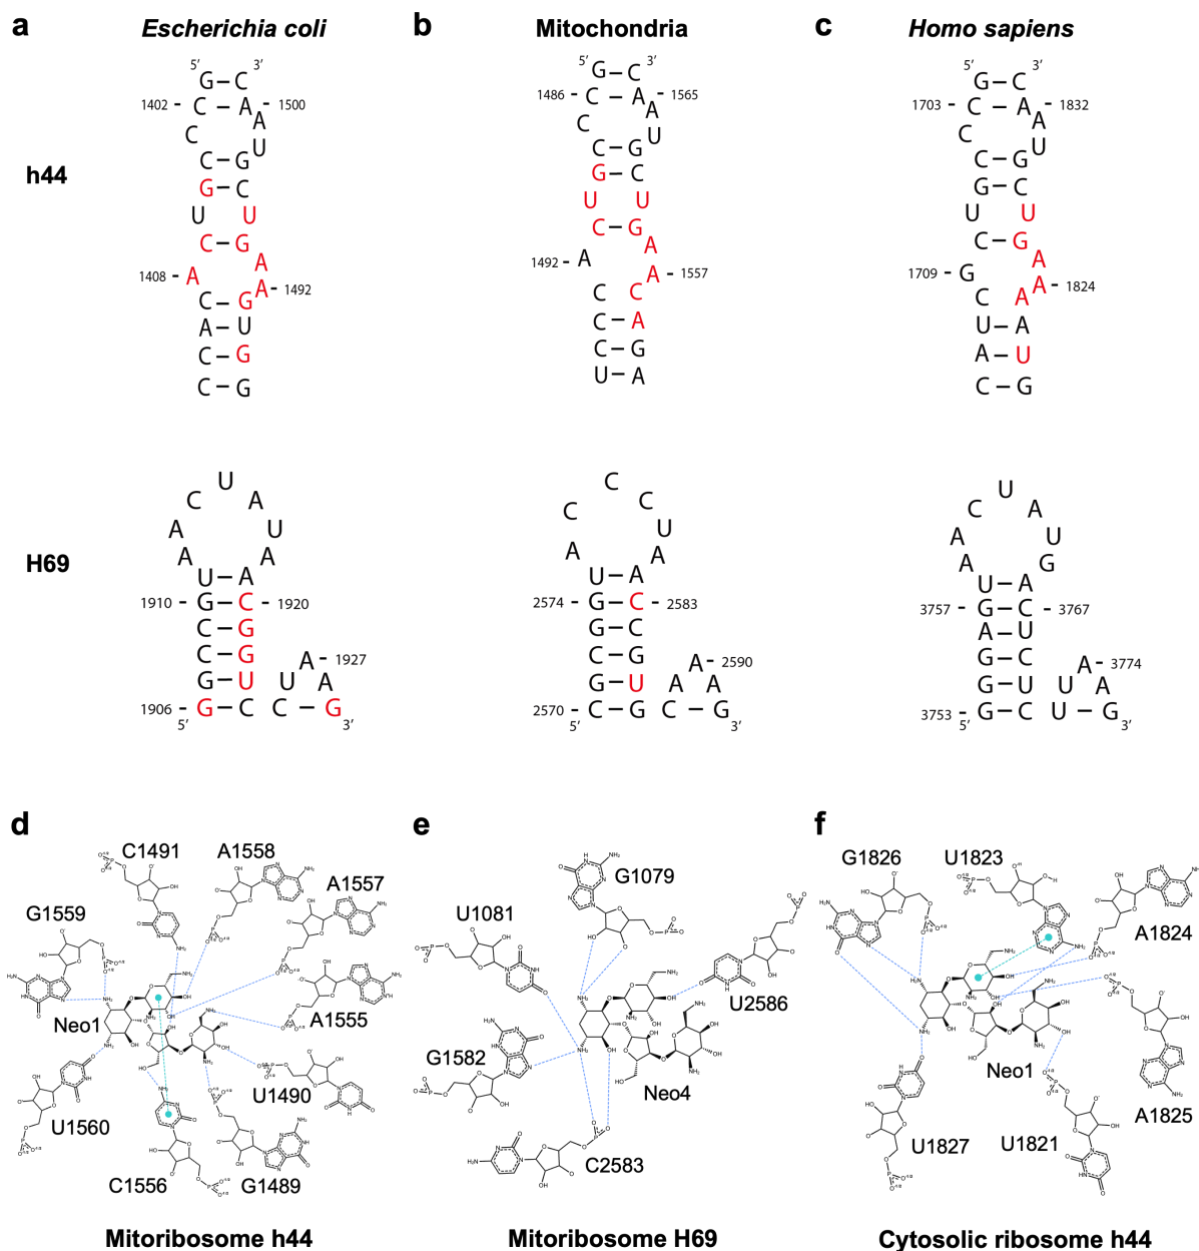

**Supplementary Fig. 2| Comparative analysis of h44 and H69, and neomycin binding.**

**a-c** Secondary structures of h44 and H69 from *Escherichia coli* (**a**), mitochondria (**b**), and *Homo sapiens* (**c**) ribosomes. **d-f** Schematic representation of h44 and H69 interactions with neomycin.

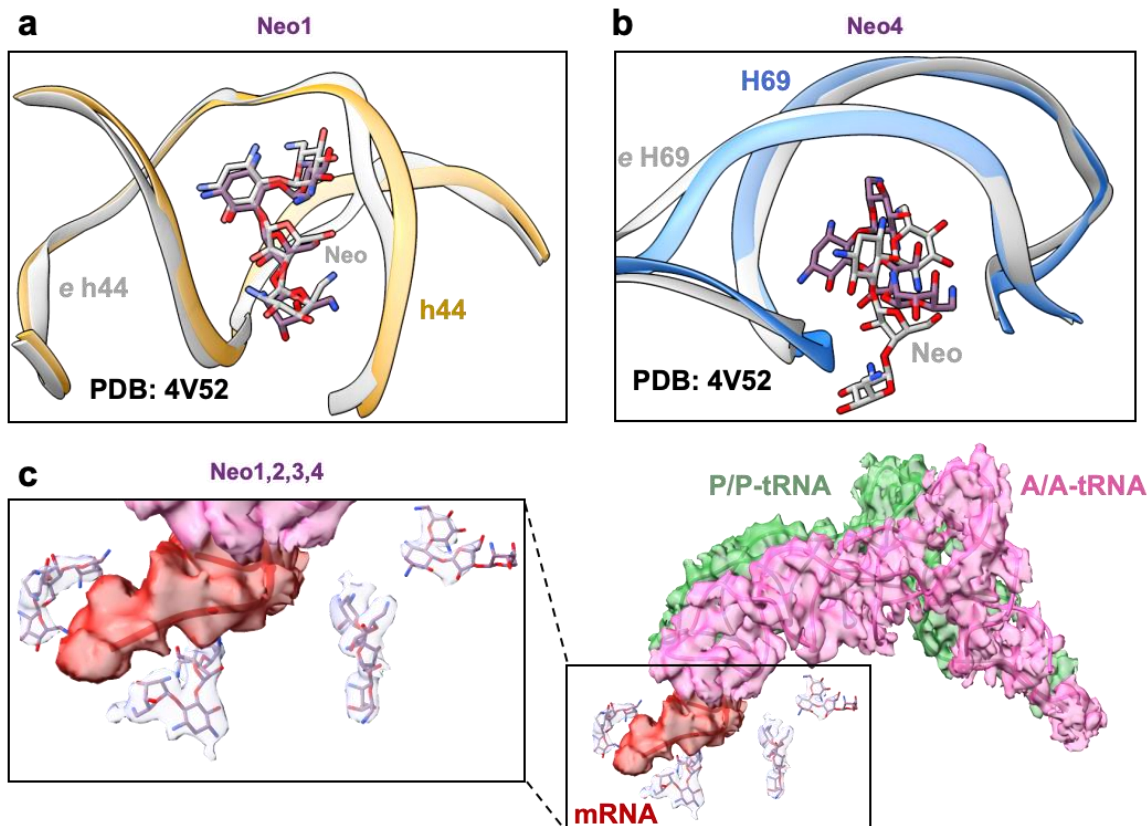

**Supplementary Fig. 3| Structural analysis of neomycin's binding to mitoribosome's decoding center. a-b** Superimposition of neomycin binding pockets within h44 (**a**) and H69 (**b**) with the bacterial ribosome (PDB: 4V52<sup>9</sup>). **c** Overview of the mRNA decoding center with bound neomycin molecules. A zoomed inset highlights the bound neomycin molecules.

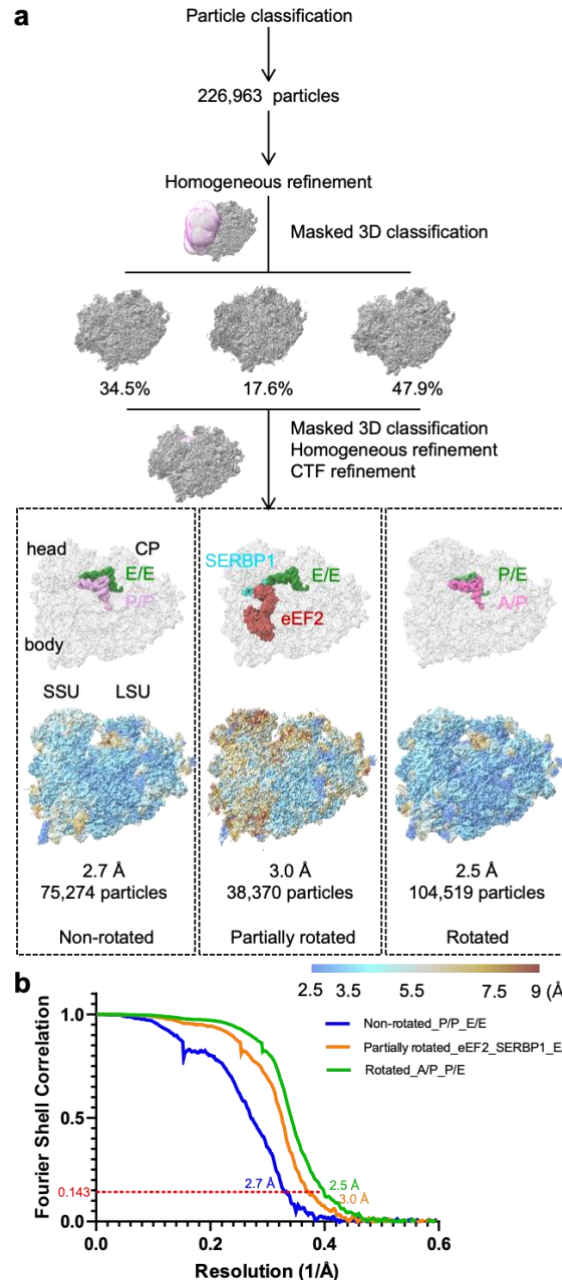

**Supplementary Fig. 4| Cryo-EM data processing of neomycin-treated cytosolic ribosomes.** **a** Cryo-EM data processing workflow of cytosolic ribosomes incubated with 50  $\mu$ M neomycin. Overall structures of cytosolic ribosomes with different bound tRNAs and cofactors, along with local resolution estimation results with the resolution scale in Å are shown. **b** FSC curves calculated for the reported maps, indicating an overall resolution at FSC = 0.143.

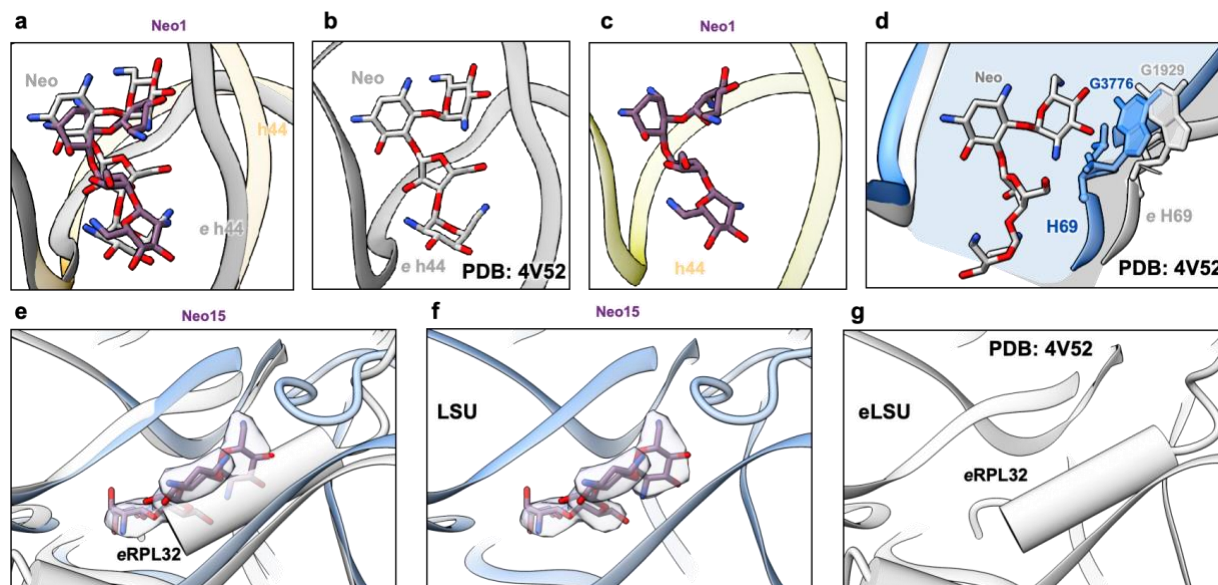

**Supplementary Fig. 5| Novel and conserved binding sites of neomycin on the cytosolic ribosome.** **a-c** Neomycin (Neo1) binding to a conserved pocket within h44. **a** Superimposition of the neomycin-bound h44 from this study (yellow) and bacterial ribosome (PDB: 4V52<sup>9</sup>, grey). **b** Neomycin molecules bound to the bacterial ribosome. **c** Neomycin molecules bound to human cytosolic ribosome. **d** Superimposition of H69 from this study (blue) and neomycin-bound H69 (grey) from the bacterial ribosome (PDB: 4V52<sup>9</sup>). Potential steric clashes are highlighted, with contributing nucleotides shown as sticks. The area size of the H69 pocket is indicated in blue (human) and grey (bacteria). **e-g** Interaction of neomycin (Neo15) with a novel cytosolic ribosomal pocket. **e** Superimposition of the neomycin-bound pocket from this study (blue) and bacterial ribosome (PDB: 4V52<sup>9</sup>, grey). This neomycin binding pocket is typically occupied by RPL32 in the bacterial ribosome. **f** Neo15 is shown interacting with this novel cytosolic ribosomal pocket. **g** The corresponding pocket is occupied by RPL32 in the bacterial ribosome.

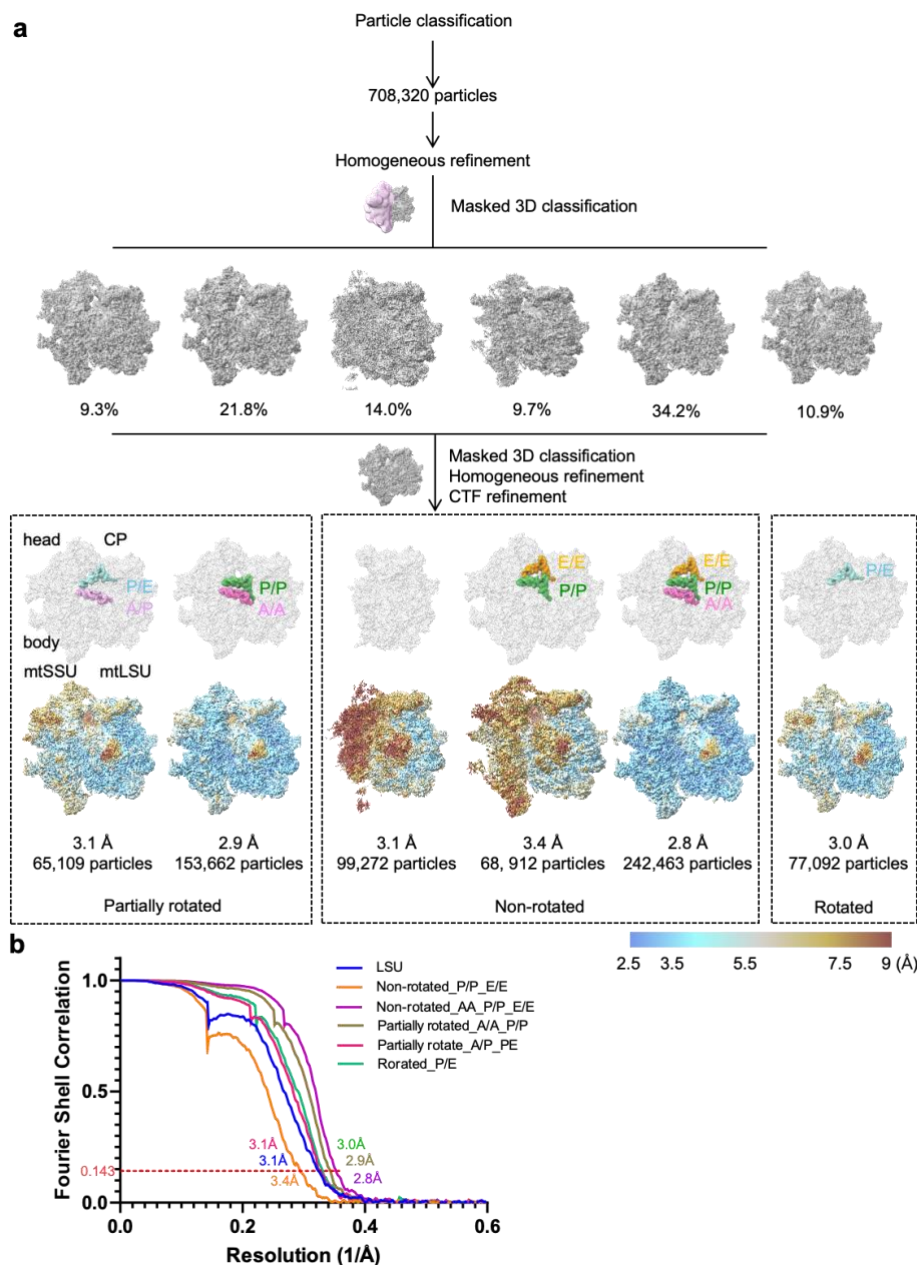

**Supplementary Fig. 6| Cryo-EM data processing of mitoribosomes from neomycin-treated cells.** **a** Cryo-EM data processing workflow for native mitoribosomes isolated from 1 mM neomycin-treated cells. Overall structures of mitoribosomes with bound tRNAs and cofactors, along with local resolution estimation results with resolution scale in Å are shown. **b** FSC curves calculated for the reported maps, indicating an overall resolution at FSC = 0.143.

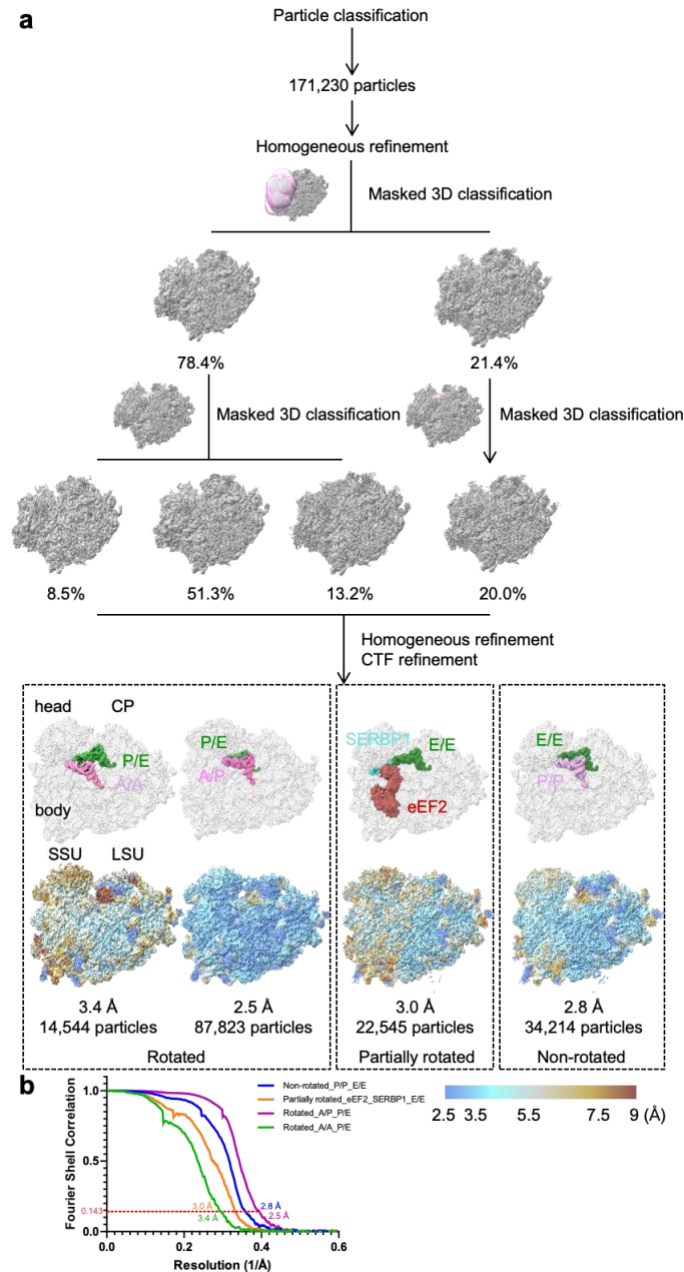

**Supplementary Fig. 7| Cryo-EM data processing of cytosolic ribosomes from neomycin-treated cells.** **a** Cryo-EM data processing workflow for native cytosolic ribosomes isolated from 1 mM neomycin-treated cells. Overall structures of cytosolic ribosomes with different bound tRNAs and cofactors, along with local resolution estimation results with resolution scale in Å are shown. **b** FSC curves calculated for the reported maps, indicating an overall resolution at FSC = 0.143.

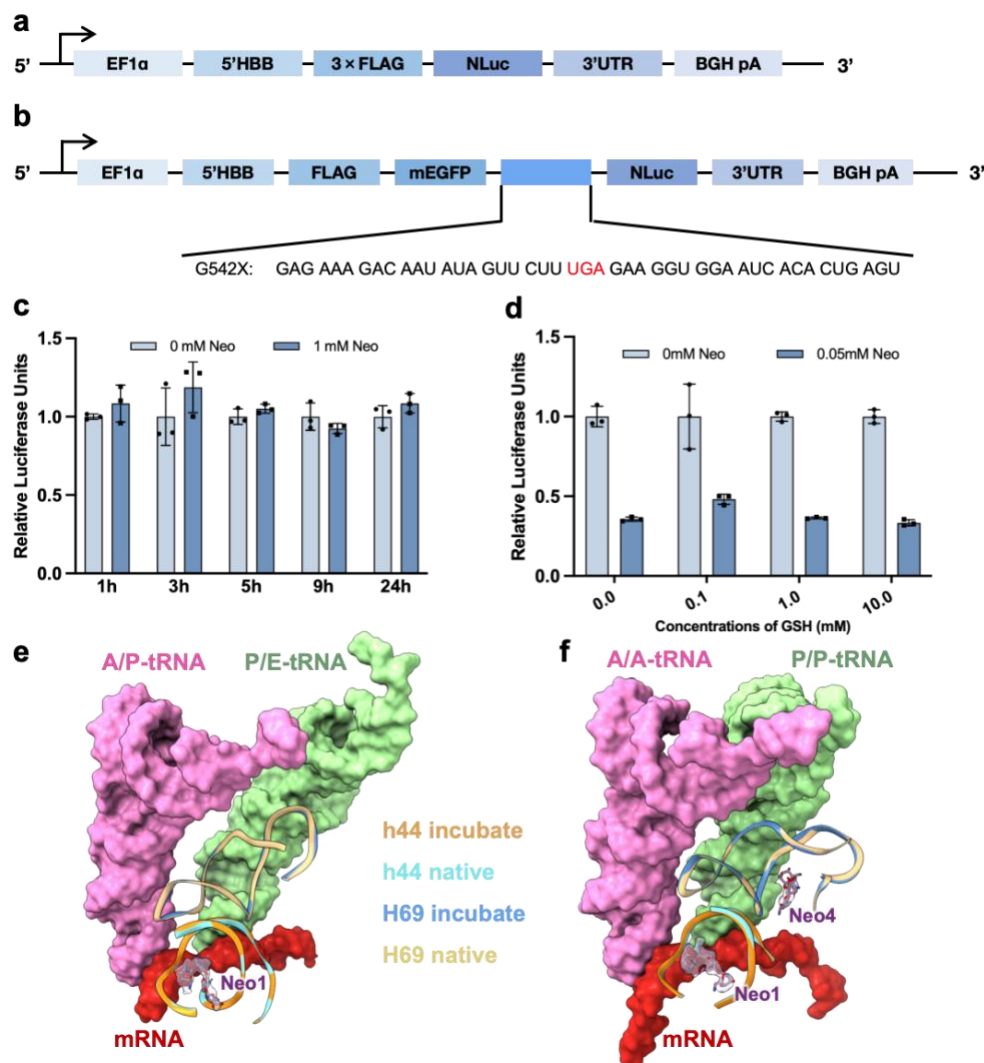

**Supplementary Fig. 8| *In vivo* translation assays and structural analysis of the decoding center.** **a** Schematic representation of the NLuc (**a**) and CFTR (G542X) (**b**) lentiviral constructs used to create stable cell lines. **c** Luciferase reporter assays using the NLuc cell line at various time points following treatment with different concentrations of neomycin. **d** *In vitro* translation assays with luciferase reporters in response to different concentrations of neomycin and increased concentrations of 0.1, 1 and 10 mM GSH. **e-f** Structure superimposition of decoding centers from the cytosolic ribosome (**e**) and mitoribosome (**f**) undergoing different neomycin treatments.

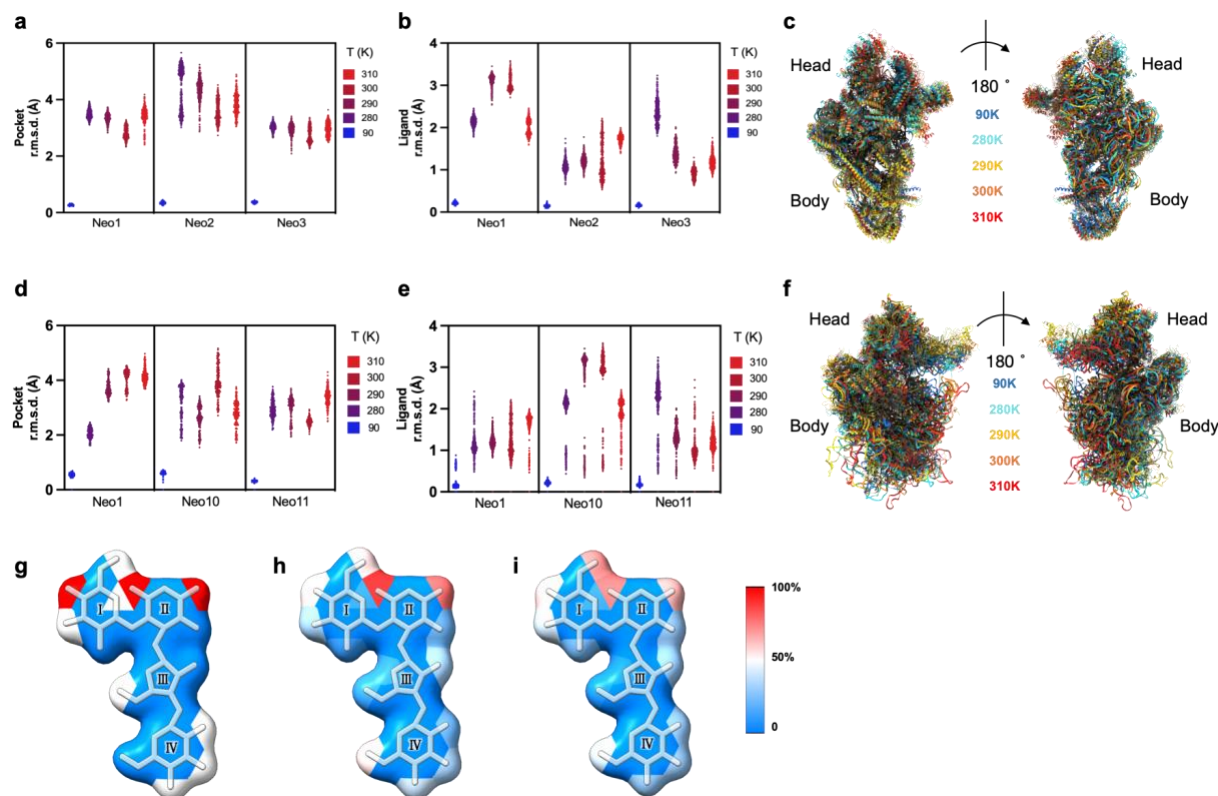

**Supplementary Fig. 9 | Temperature-dependent MD simulations of neomycin-ribosome interactions and neomycin contact modules.** **a-b** MD simulations depicting the temperature-dependent binding stability of neomycin molecules (Neo1, Neo2, and Neo3) within mtSSU. The RMSD from their initial binding poses of both the binding pockets (**a**) and the neomycin molecules (**b**), across temperatures from 90 K to 310 K. **c** Representative mtSSU structures generated by temperature-dependent MD simulations. **d-e** MD simulations depicting the temperature-dependent binding stability of neomycin molecules (Neo1, Neo10, and Neo11) within SSU. The RMSD from their initial binding poses of both binding pockets (**d**) and their initial binding poses for neomycin molecules (**e**) are shown across temperatures from 90 K to 310 K. **f** Representative SSU structures generated by temperature-dependent MD simulations. **g-i** Interaction frequency of neomycin's moieties with the bacterial ribosome (**g**), mitoribosome (**h**) and cytosolic ribosome (**i**). The chemical structure of neomycin is represented in stick and surface, with contact frequency indicated by color (blue for low frequency, red for high frequency).

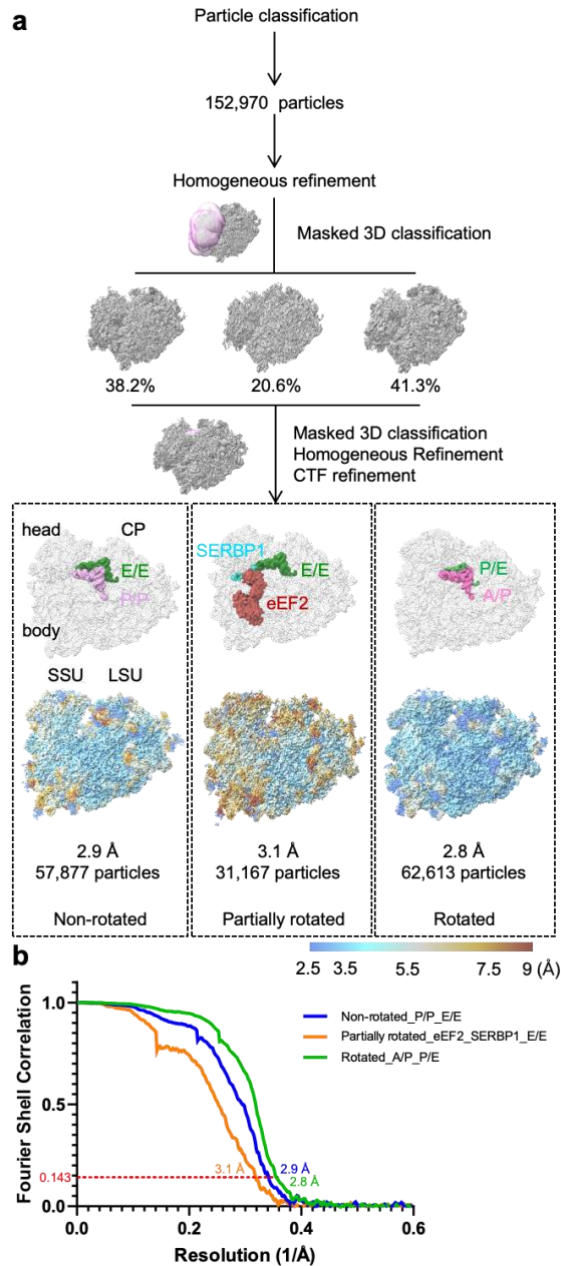

**Supplementary Fig. 10| Cryo-EM data processing of mitoribosomes from neomycin-treated cells.** **a** Cryo-EM data processing workflow of native mitoribosomes isolated from 3 mM neomycin-treated cells. Overall structures of mitoribosomes with different bound tRNAs and cofactors, along with local resolution estimation results with resolution scale in Å are shown. **b** FSC curves calculated for the reported maps, indicating an overall resolution at FSC = 0.143.

**Supplementary Table. 1| Cryo-EM data collection, processing, model refinement, and validation statistics for mitoribosomes incubated with 50  $\mu$ M neomycin.**

|                                                  | Mitoribosome<br>, Non-rotated<br>state,<br>A/A-P/P | Mitoribosome<br>, Non-rotated<br>state,<br>A/A-P/P-E/E | Mitoribosome<br>, Partially<br>rotated state,<br>A/A-P/P-E/E | Mitoribosome<br>, Partially<br>rotated state,<br>A/P-P/E | Mitoribosome<br>, Rotated<br>state | Mitoribosome<br>, Rotated<br>state,<br>A/P-P/E |
|--------------------------------------------------|----------------------------------------------------|--------------------------------------------------------|--------------------------------------------------------------|----------------------------------------------------------|------------------------------------|------------------------------------------------|
| EMDB                                             | 65433                                              | 65426                                                  | 65427                                                        | 65428                                                    | 65429                              | 65431                                          |
| PDB                                              | 9VXM                                               |                                                        |                                                              |                                                          |                                    |                                                |
| <b>Data collection and processing</b>            |                                                    |                                                        |                                                              |                                                          |                                    |                                                |
| Magnification                                    | 96000x                                             | 96000x                                                 | 96000x                                                       | 96000x                                                   | 96000x                             | 96000x                                         |
| Voltage (kV)                                     | 300                                                | 300                                                    | 300                                                          | 300                                                      | 300                                | 300                                            |
| Electron exposure (e-/Å <sup>2</sup> )           | 50                                                 | 50                                                     | 50                                                           | 50                                                       | 50                                 | 50                                             |
| Defocus range (μm)                               | -1 to -2                                           | -1 to -2                                               | -1 to -2                                                     | -1 to -2                                                 | -1 to -2                           | -1 to -2                                       |
| Pixel size (Å)                                   | 0.81                                               | 0.81                                                   | 0.81                                                         | 0.81                                                     | 0.81                               | 0.81                                           |
| Symmetry imposed                                 | <i>C1</i>                                          | <i>C1</i>                                              | <i>C1</i>                                                    | <i>C1</i>                                                | <i>C1</i>                          | <i>C1</i>                                      |
| Initial particle images (no.)                    | 402,000                                            | 402,000                                                | 402,000                                                      | 402,000                                                  | 402,000                            | 402,000                                        |
| Final particle images (no.)                      | 47,726                                             | 48,085                                                 | 17,100                                                       | 22,711                                                   | 17,305                             | 14,877                                         |
| Map resolution (Å)                               |                                                    |                                                        |                                                              |                                                          |                                    |                                                |
| FSC threshold                                    | 0.143                                              | 0.143                                                  | 0.143                                                        | 0.143                                                    | 0.143                              | 0.143                                          |
| Map resolution range (Å)                         | 2.9                                                | 3.0                                                    | 3.3                                                          | 3.2                                                      | 3.2                                | 3.3                                            |
| <b>Refinement</b>                                |                                                    |                                                        |                                                              |                                                          |                                    |                                                |
| Initial model used<br>(PDB code)                 | 7QI5                                               |                                                        |                                                              |                                                          |                                    |                                                |
| Model resolution (Å)                             |                                                    |                                                        |                                                              |                                                          |                                    |                                                |
| FSC threshold                                    | 3.1                                                |                                                        |                                                              |                                                          |                                    |                                                |
| Model resolution range (Å)                       | 0.5                                                |                                                        |                                                              |                                                          |                                    |                                                |
| Map sharpening <i>B</i> factor (Å <sup>2</sup> ) | 58.6                                               |                                                        |                                                              |                                                          |                                    |                                                |
| Model composition                                |                                                    |                                                        |                                                              |                                                          |                                    |                                                |
| Non-hydrogen atoms                               | 176678                                             |                                                        |                                                              |                                                          |                                    |                                                |
| Protein residues                                 | 14395                                              |                                                        |                                                              |                                                          |                                    |                                                |
| Ligands                                          | 284                                                |                                                        |                                                              |                                                          |                                    |                                                |
| <i>B</i> factors (Å <sup>2</sup> )               |                                                    |                                                        |                                                              |                                                          |                                    |                                                |
| Protein                                          | 94.20                                              |                                                        |                                                              |                                                          |                                    |                                                |
| Ligand                                           | 73.82                                              |                                                        |                                                              |                                                          |                                    |                                                |
| R.m.s. deviations                                |                                                    |                                                        |                                                              |                                                          |                                    |                                                |
| Bond lengths (Å)                                 | 0.006                                              |                                                        |                                                              |                                                          |                                    |                                                |
| Bond angles (°)                                  | 0.966                                              |                                                        |                                                              |                                                          |                                    |                                                |
| Validation                                       |                                                    |                                                        |                                                              |                                                          |                                    |                                                |
| MolProbity score                                 | 2.53                                               |                                                        |                                                              |                                                          |                                    |                                                |
| Clashscore                                       | 11.95                                              |                                                        |                                                              |                                                          |                                    |                                                |
| Poor rotamers (%)                                | 4.79                                               |                                                        |                                                              |                                                          |                                    |                                                |
| Ramachandran plot                                |                                                    |                                                        |                                                              |                                                          |                                    |                                                |
| Favored (%)                                      | 93.68                                              |                                                        |                                                              |                                                          |                                    |                                                |
| Allowed (%)                                      | 5.87                                               |                                                        |                                                              |                                                          |                                    |                                                |
| Disallowed (%)                                   | 0.45                                               |                                                        |                                                              |                                                          |                                    |                                                |

**Supplementary Table. 2| Neomycin binding pockets in *in vitro* and *in vivo* mitoribosome states.** This table details the neomycin molecules bound in different mitoribosome states, including their respective binding pockets and proximal nucleotide information. Asterisks (\*) denote the quality of the neomycin density, where the number of asterisks corresponds to the count of discernible organic rings of neomycin in the density map.

| State  |                |                     | <i>In vitro</i>                          |                                              |                                                    |                                                |                                  |                             | <i>In vivo</i> |                                          |                                              |                                                |                                                |                                  |
|--------|----------------|---------------------|------------------------------------------|----------------------------------------------|----------------------------------------------------|------------------------------------------------|----------------------------------|-----------------------------|----------------|------------------------------------------|----------------------------------------------|------------------------------------------------|------------------------------------------------|----------------------------------|
|        |                |                     | Mitoribosome, Non-rotated state, A/A-P/P | Mitoribosome, Non-rotated state, A/A-P/P-E/E | Mitoribosome, Partially rotated state, A/A-P/P-E/E | Mitoribosome, Partially rotated state, A/P-P/E | Mitoribosome, Rotated state, E/E | Mitoribosome, Rotated state | mtLSU          | Mitoribosome, Non-rotated state, P/P-E/E | Mitoribosome, Non-rotated state, A/A-P/P-E/E | Mitoribosome, Partially rotated state, A/A-P/P | Mitoribosome, Partially rotated state, A/P-P/E | Mitoribosome, Rotated state, P/E |
| Number | Binding pocket | Proximal nucleotide |                                          |                                              |                                                    |                                                |                                  |                             |                |                                          |                                              |                                                |                                                |                                  |
| Neo1   | h44            | 12S A1556           | ****                                     | ****                                         | ***                                                | ****                                           | **                               | **                          |                |                                          |                                              |                                                |                                                |                                  |
| Neo2   | h1+h44         | 12S C1487           | ****                                     | ****                                         | ***                                                | ***                                            | ***                              | ***                         |                |                                          |                                              |                                                |                                                |                                  |
| Neo3   | h28            | 12S A1470           | ****                                     | ****                                         | ***                                                | ****                                           | ****                             | ****                        |                |                                          |                                              |                                                |                                                |                                  |
| Neo4   | H69            | 16S C2583           | ***                                      | ***                                          |                                                    |                                                |                                  |                             |                |                                          |                                              |                                                |                                                |                                  |
| Neo5   | H91+H95        | 16S G3019           | ****                                     | ****                                         | ****                                               |                                                | ****                             | ****                        |                |                                          |                                              |                                                |                                                |                                  |
| Neo6   | H35#           | 16S G1949           |                                          |                                              | ***                                                |                                                |                                  |                             |                |                                          |                                              |                                                |                                                |                                  |
| Neo7   | H33#           | 16S U2404           | ****                                     | ***                                          |                                                    | **                                             |                                  | ****                        |                |                                          |                                              |                                                |                                                |                                  |
| Neo8   | H73+H72        | 16S A2707           | ****                                     | ****                                         | ***                                                | ****                                           | ****                             | ****                        |                |                                          |                                              |                                                |                                                |                                  |
| Neo9   | H39+H37+H75    | 16S C2116           | **                                       | **                                           |                                                    | **                                             | **                               | **                          |                |                                          |                                              |                                                |                                                |                                  |

#: rRNA has relatively low conservation.

**Supplementary Table. 3| Cryo-EM data collection, processing, model refinement,  
and validation statistics for cytosolic ribosomes incubated with 50  $\mu$ M neomycin.**

|                                                     | Cytosolic ribosome,<br>Rotated state,<br>A/P-P/E | Cytosolic ribosome,<br>Partially rotated state,<br>eEF2, SERBP1, E/E | Cytosolic ribosome,<br>Non-rotated state,<br>P/P-E/E |
|-----------------------------------------------------|--------------------------------------------------|----------------------------------------------------------------------|------------------------------------------------------|
| EMDB                                                | 65434                                            | 65412                                                                | 65419                                                |
| PDB                                                 | 9VXN                                             |                                                                      |                                                      |
| <b>Data collection and processing</b>               |                                                  |                                                                      |                                                      |
| Magnification                                       | 96000x                                           | 96000x                                                               | 96000x                                               |
| Voltage (kV)                                        | 300                                              | 300                                                                  | 300                                                  |
| Electron exposure (e <sup>-</sup> /Å <sup>2</sup> ) | 50                                               | 50                                                                   | 50                                                   |
| Defocus range (μm)                                  | -1 to -2                                         | -1 to -2                                                             | -1 to -2                                             |
| Pixel size (Å)                                      | 0.81                                             | 0.81                                                                 | 0.81                                                 |
| Symmetry imposed                                    | <i>C1</i>                                        | <i>C1</i>                                                            | <i>C1</i>                                            |
| Initial particle images (no.)                       | 972,883                                          | 972,883                                                              | 972,883                                              |
| Final particle images (no.)                         | 104,519                                          | 38,370                                                               | 75,274                                               |
| Map resolution (Å)                                  | 2.5                                              | 3.0                                                                  | 2.7                                                  |
| FSC threshold                                       |                                                  |                                                                      |                                                      |
| Map resolution range (Å)                            | 0.143                                            | 0.143                                                                | 0.143                                                |
| <b>Refinement</b>                                   |                                                  |                                                                      |                                                      |
| Initial model used<br>(PDB code)                    | 8QOI                                             |                                                                      |                                                      |
| Model resolution (Å)                                | 2.8                                              |                                                                      |                                                      |
| FSC threshold                                       |                                                  |                                                                      |                                                      |
| Model resolution range (Å)                          | 0.5                                              |                                                                      |                                                      |
| Map sharpening <i>B</i> factor (Å <sup>2</sup> )    | 38.8                                             |                                                                      |                                                      |
| Model composition                                   |                                                  |                                                                      |                                                      |
| Non-hydrogen atoms                                  | 217929                                           |                                                                      |                                                      |
| Protein residues                                    | 11439                                            |                                                                      |                                                      |
| Ligands                                             | 429                                              |                                                                      |                                                      |
| <i>B</i> factors (Å <sup>2</sup> )                  |                                                  |                                                                      |                                                      |
| Protein                                             | 62.89                                            |                                                                      |                                                      |
| Ligand                                              | 57.76                                            |                                                                      |                                                      |
| R.m.s. deviations                                   |                                                  |                                                                      |                                                      |
| Bond lengths (Å)                                    | 0.009                                            |                                                                      |                                                      |
| Bond angles (°)                                     | 0.956                                            |                                                                      |                                                      |
| Validation                                          |                                                  |                                                                      |                                                      |
| MolProbity score                                    | 2.42                                             |                                                                      |                                                      |
| Clashscore                                          | 11.28                                            |                                                                      |                                                      |
| Poor rotamers (%)                                   | 4.19                                             |                                                                      |                                                      |
| Ramachandran plot                                   |                                                  |                                                                      |                                                      |
| Favored (%)                                         | 94.51                                            |                                                                      |                                                      |
| Allowed (%)                                         | 4.99                                             |                                                                      |                                                      |
| Disallowed (%)                                      | 0.51                                             |                                                                      |                                                      |

**Supplementary Table. 4| Neomycin binding pockets in cytosolic ribosome states.**

This table details the neomycin molecules bound in various cytosolic ribosome states, including their respective binding pockets and proximal nucleotide information. Asterisks (\*) denote the quality of the neomycin density, where the number of asterisks corresponds to the count of discernible organic rings of neomycin in the density map.

| Number | Binding pocket                                            | State<br>Proximal nucleotide | <i>In vitro</i>                                |                                                                |                                            | <i>In vivo</i> (1 mM)                          |                                                                |                                            |                                            | <i>In vivo</i> (3 mM)                          |                                                                |                                            |
|--------|-----------------------------------------------------------|------------------------------|------------------------------------------------|----------------------------------------------------------------|--------------------------------------------|------------------------------------------------|----------------------------------------------------------------|--------------------------------------------|--------------------------------------------|------------------------------------------------|----------------------------------------------------------------|--------------------------------------------|
|        |                                                           |                              | Cytosolic ribosome, Non-rotated state, P/P-E/E | Cytosolic ribosome, Partially rotated state, eEF2, SERBP1, E/E | Cytosolic ribosome, Rotated state, A/P-P/E | Cytosolic ribosome, Non-rotated state, P/P-E/E | Cytosolic ribosome, Partially rotated state, eEF2, SERBP1, E/E | Cytosolic ribosome, Rotated state, A/A-P/E | Cytosolic ribosome, Rotated state, A/P-P/E | Cytosolic ribosome, Non-rotated state, P/P-E/E | Cytosolic ribosome, Partially rotated state, eEF2, SERBP1, E/E | Cytosolic ribosome, Rotated state, A/P-P/E |
| Neo1   | h44                                                       | 18S A1825                    | **                                             | **                                                             | ***                                        |                                                |                                                                |                                            |                                            |                                                |                                                                |                                            |
| Neo10  | h28+h37+h40                                               | 18S U1343                    | ****                                           |                                                                | ****                                       | ****                                           | ****                                                           |                                            | ****                                       |                                                |                                                                |                                            |
| Neo11  | h44                                                       | 18S G1726                    | ****                                           | ****                                                           | ****                                       |                                                | **                                                             | **                                         | ****                                       |                                                |                                                                |                                            |
| Neo12  | H62+H34                                                   | 28S G2868                    | ****                                           | ****                                                           | ****                                       | ****                                           |                                                                | **                                         | ****                                       |                                                |                                                                |                                            |
| Neo13  | H41+H42+H89                                               | 28S A1939                    | ****                                           | ****                                                           | ****                                       | ****                                           |                                                                | ****                                       | ****                                       |                                                |                                                                |                                            |
| Neo14  | H89+H10+H72                                               | 28S A2047                    | ****                                           | ***                                                            | ****                                       |                                                |                                                                |                                            | ***                                        |                                                |                                                                |                                            |
| Neo15  | H24+H26+H2 ( 23S in Prokaryote , 28S+5.8S in Eukaryotes ) | 28S G2358                    | ****                                           | ****                                                           | ****                                       | ****                                           | ****                                                           | ****                                       | ****                                       | **                                             |                                                                | **                                         |
| Neo16  | h44                                                       | 18S G1726                    | ****                                           | ****                                                           | ****                                       |                                                | **                                                             | **                                         | ****                                       |                                                |                                                                |                                            |
| Neo17  | H39+5s rRNA                                               | 28S U1861                    | ****                                           | ****                                                           | ****                                       | ****                                           | ****                                                           | ****                                       | ****                                       |                                                |                                                                |                                            |
| Neo18  | H42                                                       | 28S C1931                    | ****                                           | ****                                                           | ****                                       | ****                                           | ****                                                           | ****                                       | ****                                       |                                                |                                                                |                                            |
| Neo19  | H54+H53+L7a                                               | 28S G2777                    | ****                                           | **                                                             | ****                                       |                                                |                                                                | ****                                       |                                            |                                                |                                                                |                                            |
| Neo20  | H58#                                                      | 28S G2645                    | ****                                           | ***                                                            | ****                                       | **                                             |                                                                |                                            | **                                         |                                                |                                                                |                                            |
| Neo21  | H91+H95                                                   | 28S U4481                    | ****                                           | ****                                                           | ****                                       |                                                |                                                                |                                            |                                            |                                                |                                                                |                                            |
| Neo22  | H58                                                       | 28S C2683                    | ****                                           | ****                                                           | ****                                       |                                                |                                                                |                                            | ****                                       |                                                |                                                                |                                            |
| Neo23  | H74                                                       | 28S C3909                    |                                                | **                                                             | ****                                       |                                                |                                                                |                                            | **                                         |                                                |                                                                |                                            |
| Neo24  | H89+H91+H42+H90                                           | 28S A4484                    |                                                |                                                                | ****                                       |                                                |                                                                |                                            |                                            |                                                |                                                                |                                            |
| Neo25  | H66+h24 (The interface of the LSU and SSU)                | 28S C3696                    |                                                | ****                                                           | ****                                       |                                                | ****                                                           | ****                                       | ****                                       |                                                |                                                                |                                            |

#: rRNA has relatively low conservation

**Supplementary Table. 5| Cryo-EM data collection and processing statistics for native mitoribosomes and cytosolic ribosomes isolated from neomycin-treated cells.**

| Mitoribosomes from 1mM Neo treated cells | mtLSU     | Mitoribosome, Non-rotated state, P/P-E/E | Mitoribosome, Non-rotated state, A/A-P/P-E/E | Mitoribosome, Partially rotated state, A/A-P/P | Mitoribosome, Partially rotated state, A/P-P/E | Mitoribosome, Rotated state, P/E |
|------------------------------------------|-----------|------------------------------------------|----------------------------------------------|------------------------------------------------|------------------------------------------------|----------------------------------|
| EMDB                                     | 65420     | 65421                                    | 65422                                        | 65423                                          | 65424                                          | 65425                            |
| Data collection and processing           |           |                                          |                                              |                                                |                                                |                                  |
| Magnification                            | 96000x    | 96000x                                   | 96000x                                       | 96000x                                         | 96000x                                         | 96000x                           |
| Voltage (kV)                             | 300       | 300                                      | 300                                          | 300                                            | 300                                            | 300                              |
| Electron exposure (e-/Å²)                | 50        | 50                                       | 50                                           | 50                                             | 50                                             | 50                               |
| Defocus range (µm)                       | -1 to -2  | -1 to -2                                 | -1 to -2                                     | -1 to -2                                       | -1 to -2                                       | -1 to -2                         |
| Pixel size (Å)                           | 0.81      | 0.81                                     | 0.81                                         | 0.81                                           | 0.81                                           | 0.81                             |
| Symmetry imposed                         | C1        | C1                                       | C1                                           | C1                                             | C1                                             | C1                               |
| Initial particle images (no.)            | 1,043,603 | 1,043,603                                | 1,043,603                                    | 1,043,603                                      | 1,043,603                                      | 1,043,603                        |
| Final particle images (no.)              | 99,272    | 68,912                                   | 242,463                                      | 153,662                                        | 65,109                                         | 77,092                           |
| Map resolution (Å)                       | 3.1       | 3.4                                      | 2.8                                          | 2.9                                            | 3.1                                            | 3.0                              |
| FSC threshold                            |           |                                          |                                              |                                                |                                                |                                  |
| Map resolution range (Å)                 | 0.143     | 0.143                                    | 0.143                                        | 0.143                                          | 0.143                                          | 0.143                            |

| Cytosolic ribosomes from 1mM Neo treated cells | Cytosolic ribosome, Non-rotated state, P/P-E/E | Cytosolic ribosome, Partially rotated state, eEF2, SERBP1, E/E | Cytosolic ribosome, Rotated state, A/A-P/E | Cytosolic ribosome, Rotated state, A/P-P/E |
|------------------------------------------------|------------------------------------------------|----------------------------------------------------------------|--------------------------------------------|--------------------------------------------|
| EMDB                                           | 65411                                          | 65413                                                          | 65414                                      | 65415                                      |
| Data collection and processing                 |                                                |                                                                |                                            |                                            |
| Magnification                                  | 96000x                                         | 96000x                                                         | 96000x                                     | 96000x                                     |
| Voltage (kV)                                   | 300                                            | 300                                                            | 300                                        | 300                                        |
| Electron exposure (e-/Å²)                      | 50                                             | 50                                                             | 50                                         | 50                                         |
| Defocus range (µm)                             | -1 to -2                                       | -1 to -2                                                       | -1 to -2                                   | -1 to -2                                   |
| Pixel size (Å)                                 | 0.81                                           | 0.81                                                           | 0.81                                       | 0.81                                       |
| Symmetry imposed                               | C1                                             | C1                                                             | C1                                         | C1                                         |
| Initial particle images (no.)                  | 338,609                                        | 338,609                                                        | 338,609                                    | 338,609                                    |
| Final particle images (no.)                    | 34,214                                         | 22,545                                                         | 14,544                                     | 87,823                                     |
| Map resolution (Å)                             | 2.8                                            | 3.0                                                            | 3.4                                        | 2.5                                        |
| FSC threshold                                  |                                                |                                                                |                                            |                                            |
| Map resolution range (Å)                       | 0.143                                          | 0.143                                                          | 0.143                                      | 0.143                                      |

| <b>Cytosolic ribosomes from 3mM Neo treated cells</b> | Cytosolic ribosome, Non-rotated state, P/P-E/E | Cytosolic ribosome, Partially rotated state, eEF2, SERBP1, E/E | Cytosolic ribosome, Rotated state, A/P-P/E |
|-------------------------------------------------------|------------------------------------------------|----------------------------------------------------------------|--------------------------------------------|
| EMDB                                                  | 65416                                          | 65417                                                          | 65418                                      |
| <b>Data collection and processing</b>                 |                                                |                                                                |                                            |
| Magnification                                         | 96000x                                         | 96000x                                                         | 96000x                                     |
| Voltage (kV)                                          | 300                                            | 300                                                            | 300                                        |
| Electron exposure (e-/Å <sup>2</sup> )                | 50                                             | 50                                                             | 50                                         |
| Defocus range (µm)                                    | -1 to -2                                       | -1 to -2                                                       | -1 to -2                                   |
| Pixel size (Å)                                        | 0.81                                           | 0.81                                                           | 0.81                                       |
| Symmetry imposed                                      | <i>C1</i>                                      | <i>C1</i>                                                      | <i>C1</i>                                  |
| Initial particle images (no.)                         | 902,658                                        | 902,658                                                        | 902,658                                    |
| Final particle images (no.)                           | 57,877                                         | 31,167                                                         | 62,613                                     |
| Map resolution (Å)                                    | 2.9                                            | 3.1                                                            | 2.8                                        |
| FSC threshold                                         |                                                |                                                                |                                            |
| Map resolution range (Å)                              | 0.143                                          | 0.143                                                          | 0.143                                      |
